# Supplementary material for: Dynamics of anterior–posterior axis formation in the developing mouse embryo
Source: PubMed Central journal article supplement — Nat Commun. 2012 Feb 14;3:673–. doi: 10.1038/ncomms1671 (PMC3293425; doi:10.1038/ncomms1671), 2012-02-14
Supplement: ncomms1671-s1.pdf [file ncomms1671-s1.pdf]

## **SUPPLEMENTARY INFORMATION**

### **Dynamics of anterior-posterior axis formation in the developing mouse embryo**

Samantha A. Morris, Seema Grewal, Florencia Barrios, Sameer N. Patankar, Bernhard Strauss, Lee Buttery, Morgan Alexander, Kevin M. Shakesheff and Magdalena Zernicka-Goetz

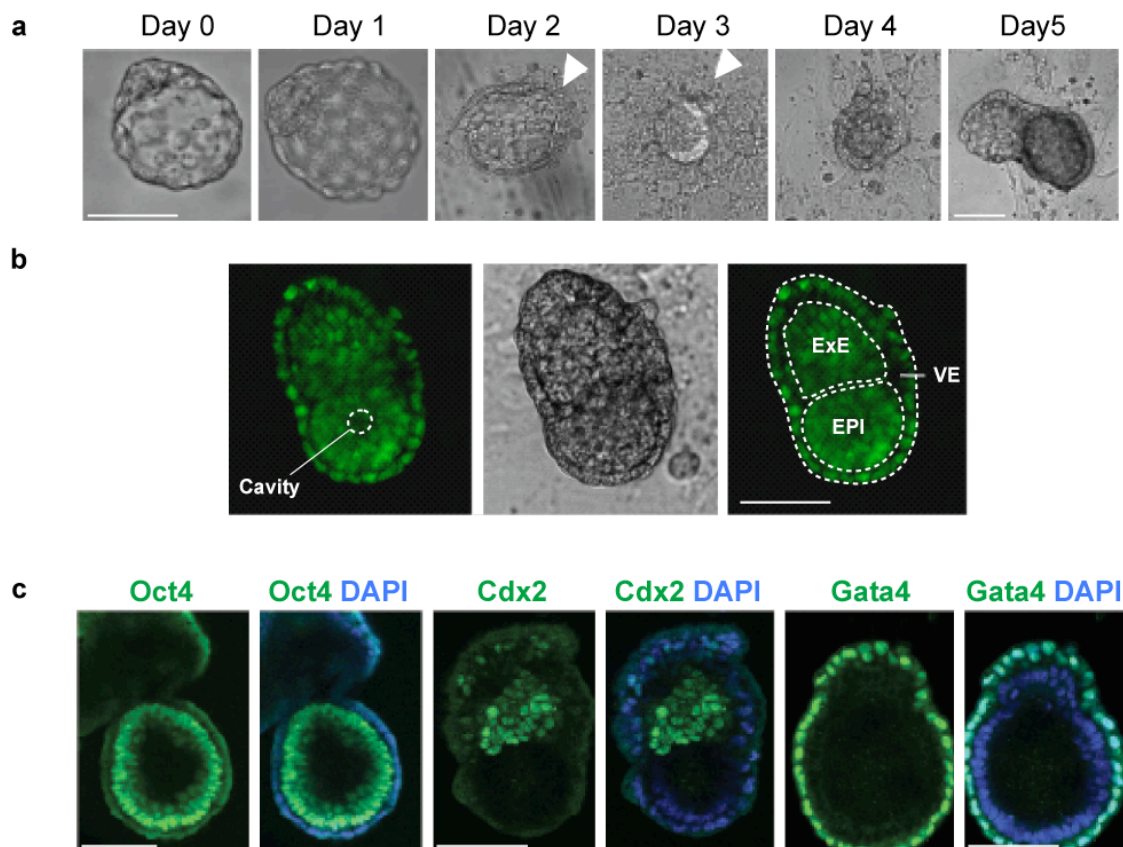

**Supplementary Figure S1: Time-course of *in vitro* cultured blastocysts on standard plastic tissue culture dishes.** (a) E3.5 blastocysts were seeded into culture in drops containing FCS (Day 0 of *in vitro* culture, scale bar represents 50  $\mu$ m). After one day, blastocyst expansion was evident. Trophoblast outgrowths (white arrows) were observed after 2 days of culture indicating attachment to the substrate. At this point FCS was replaced by HCS for the remaining culture period. Development into an egg cylinder was observed between days 4 and 5 of culture. Scale bar represents 100  $\mu$ m. (b) Early egg cylinders recovered following *in vitro* culture of Histone H2B-GFP-expressing embryos. The epiblast (EPI), extra-embryonic ectoderm (ExE) and visceral endoderm (VE) domains, and the nascent pro-amniotic cavity are indicated. Scale bar represents 100 $\mu$ m. (c) Immunostaining of egg cylinders (carried out as described previously<sup>1</sup>) showing correct spatial expression of Oct4, Cdx2, and Gata4. Nuclei are counterstained with DAPI. Scale bars represent 100  $\mu$ m.

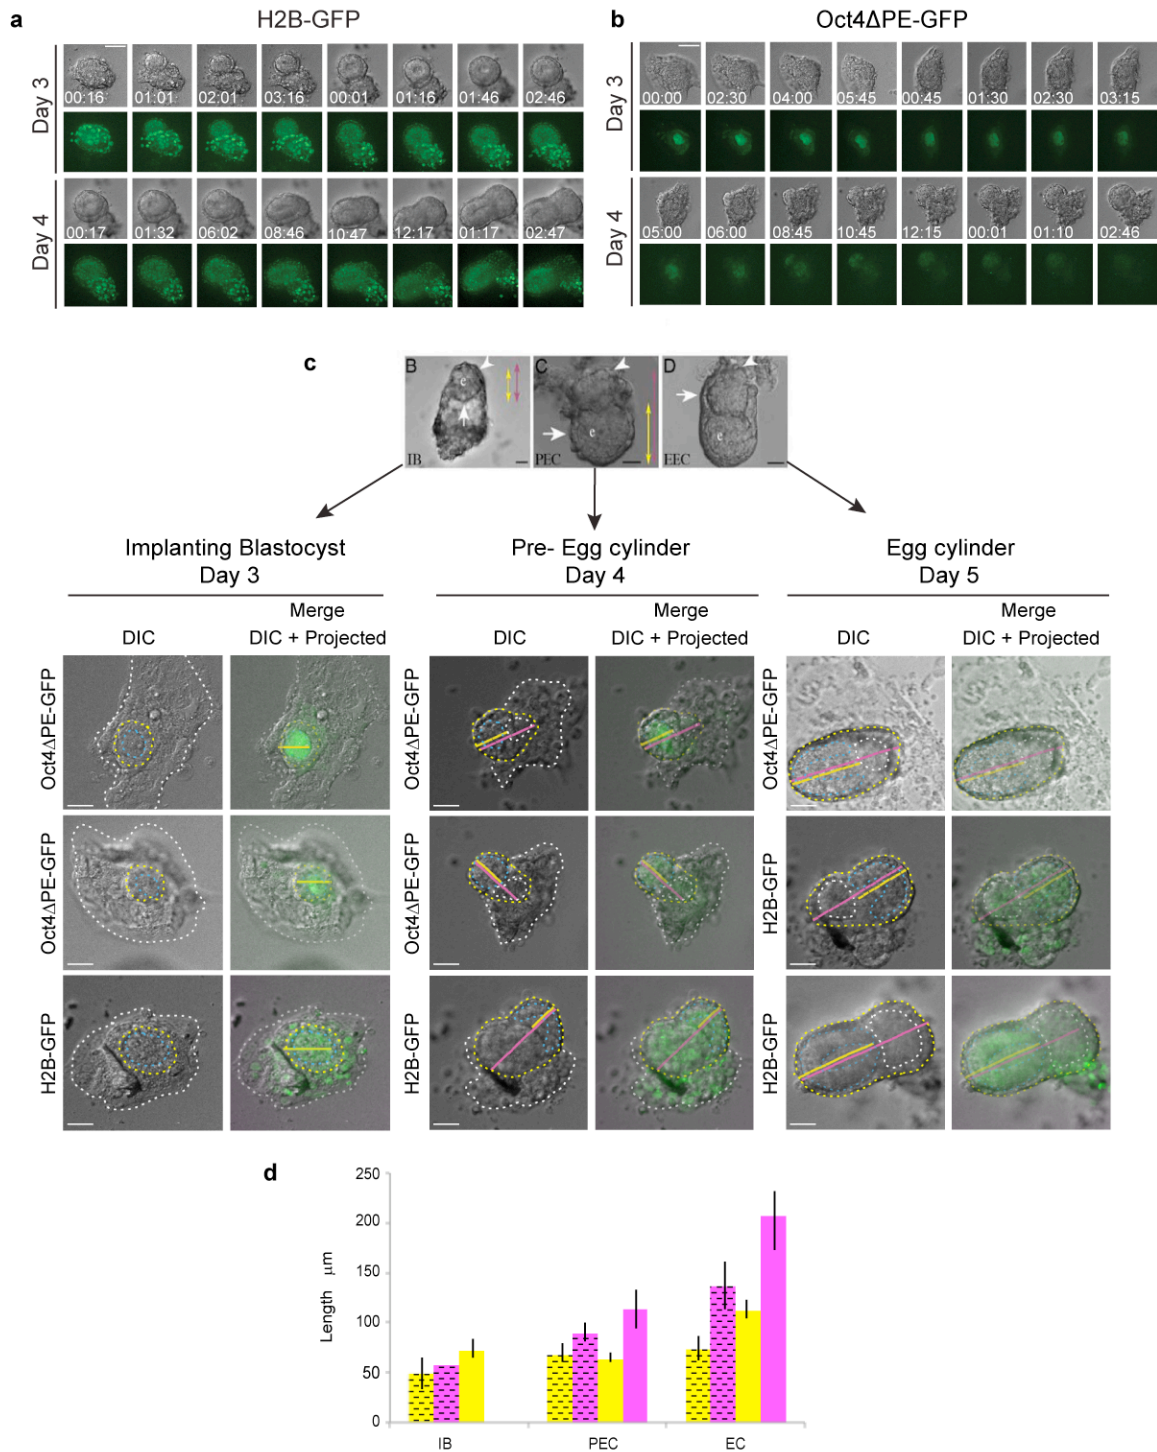

**Supplementary Figure S2: Comparison of embryos cultured *in vitro* on collagen-coated hydrogels and embryos freshly collected from the uterus. (a), (b) DIC and projected GFP images at selected time-frames from a time-lapse series of *in vitro* development showing expression of Histone H2B-GFP (a) and Oct4 $\Delta$ PE-GFP (b) transgenic embryos during *in vitro* culture. Indicated times at the bottom of each frame represent the time-frames from live-imaging. Scale bars represent 100  $\mu$ m. (c)**

Implanting blastocysts (IB), pre-egg cylinder (PEC) and egg cylinder (EC) stage embryos dissected from uteri<sup>1</sup> were compared to the corresponding developmental stages of *in vitro* cultured embryos (bottom panels). Three representative examples are given for each stage. Yellow solid lines represent the length of the embryonic part (Epi+VE), and pink solid lines the total length (embryonic + extra-embryonic). **(d)** Mean lengths of the embryonic part (yellow) and total egg cylinder (pink, embryonic + extraembryonic) of *in vitro* cultured embryos (filled columns) at the indicated stages (4 - 5 embryos measured in each case) alongside comparable measurements of counterparts developing *in vivo* (dashed columns<sup>34</sup>). Scale bars represent 50  $\mu\text{m}$ .

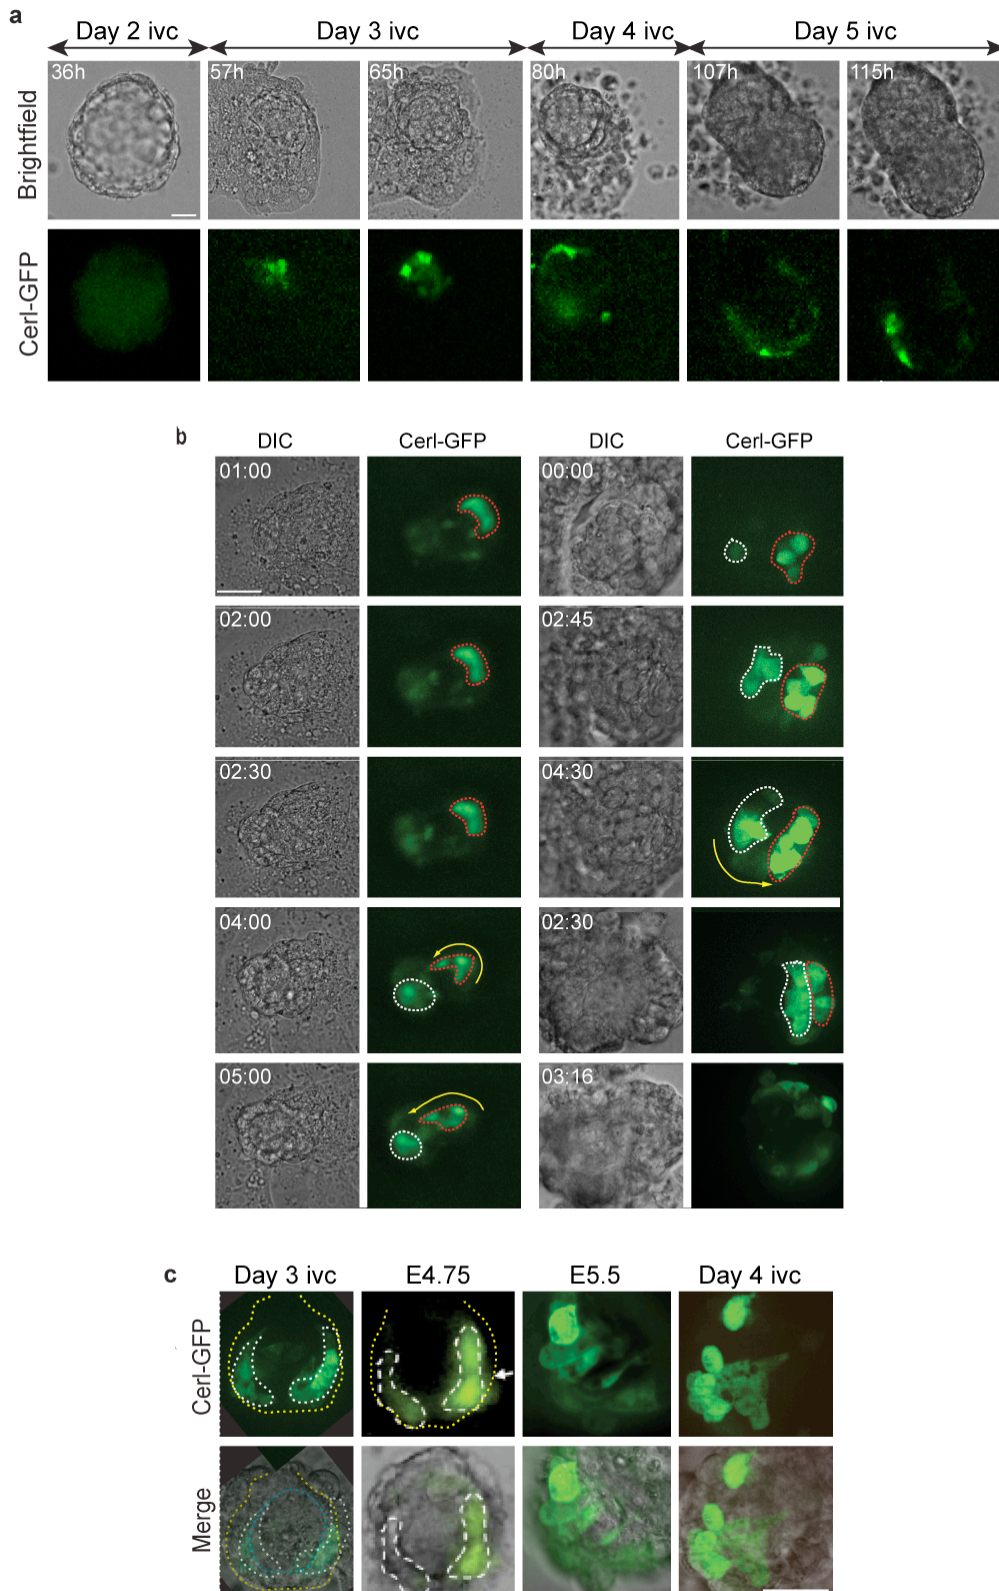

**Supplementary Figure S3: Dynamics of Cerl-GFP expression in *in vitro* cultured embryos. (a)** Example of an E3.5 Cerl-GFP-expressing embryo cultured on collagen-coated polyacrylamide gel from blastocyst to egg cylinder stage. The selected time-

frames are taken from time-lapse movie 5. Total hours of culture are indicated above each frame. Scale bar represents 20  $\mu\text{m}$  **(b)** Patterns of coalescence of domains of Cerl-GFP expression. Time-lapse observations from 2 different embryos showing how the two principal domains of Cerl-GFP expression coalesce at the distal tip. The first domain of Cerl-GFP expression to appear is encircled by a red dotted line and the second, by a white dotted line. The yellow arrowhead indicates the directional movement of the domains. Two different situations are shown: an original bright domain moves towards a dim domain, the intensity of which increases (left); a dim domain moves towards an original bright domain and becomes as bright as an original domain (right). Scale bar represents 50  $\mu\text{m}$ . **(c)** Comparison of Cerl-GFP expression pattern in embryos developing *in vitro* and *in vivo*. On the left hand side, a selected time-frame from an embryo after 3 days of *in vitro* development (*ivc*) is compared to an E4.75 embryo developing *in utero* (E4.75<sup>1</sup>). On the right hand side, a selected time-frame of an egg cylinder formed *in vitro* (Day 4) is compared to a freshly collected E5.5 embryo. Scale bar represents 50  $\mu\text{m}$ .

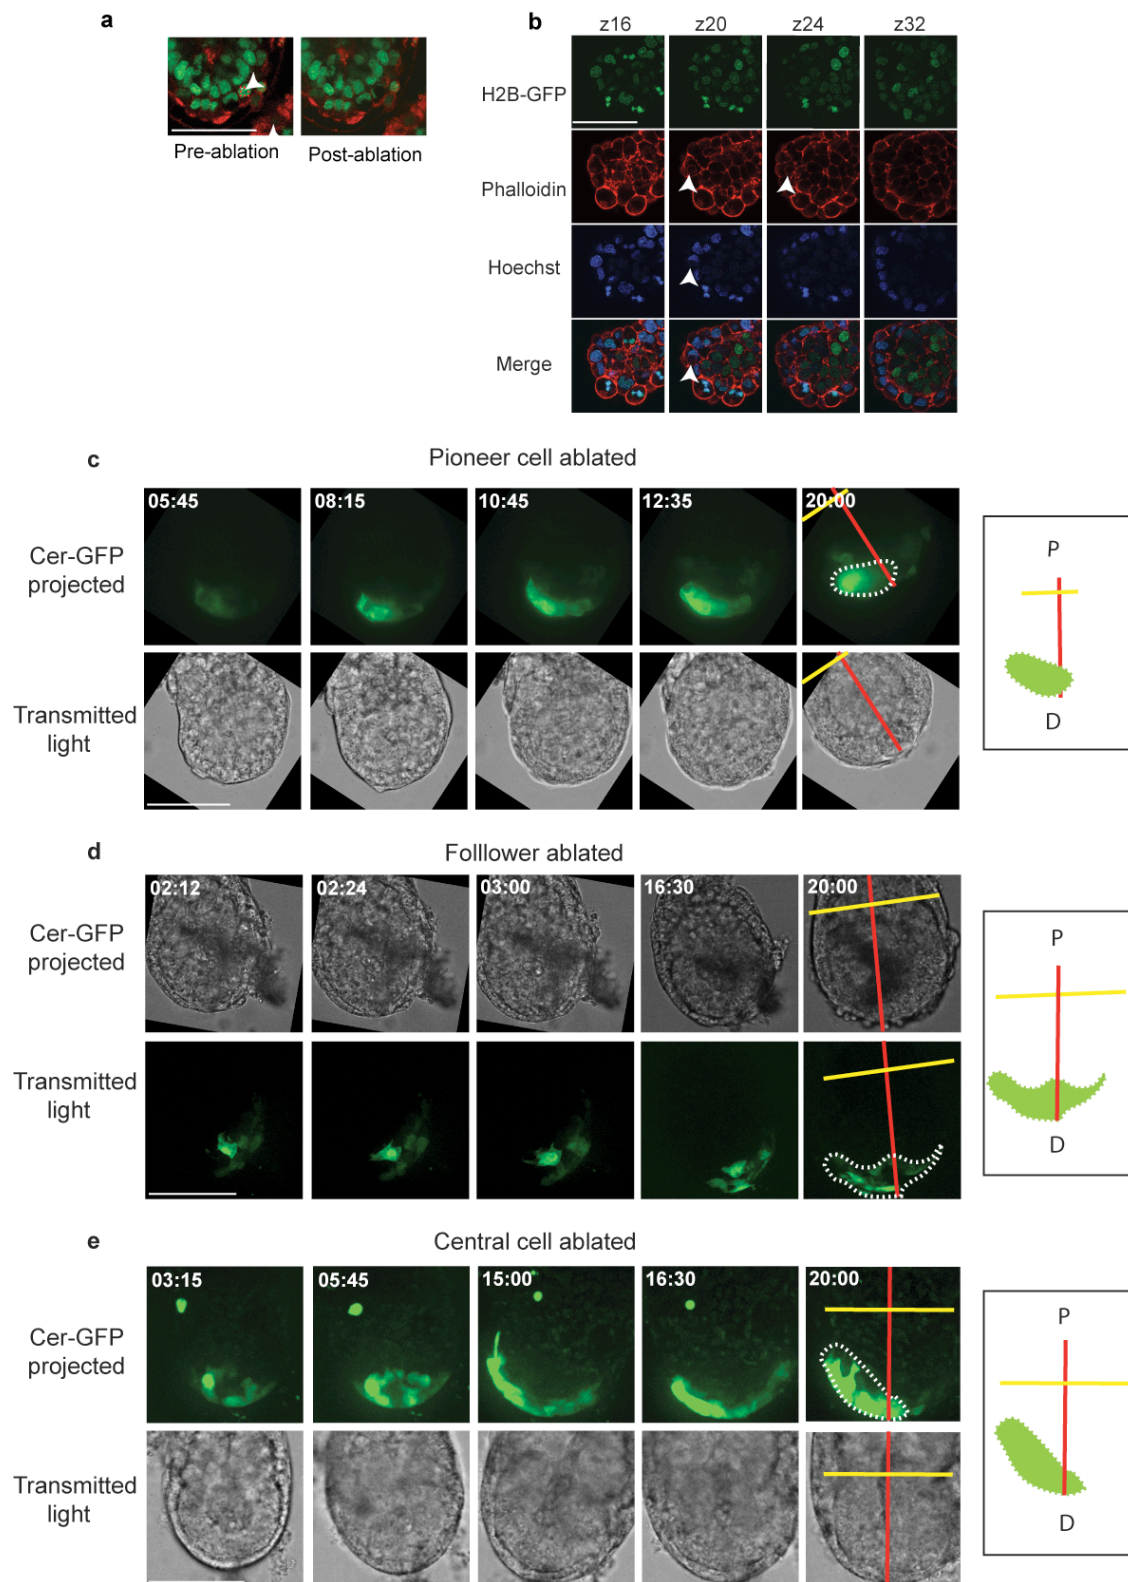

**Supplementary Figure S4: Ablation of leading AVE cells blocks AVE migration and expansion.** (a) Stills from live-imaging of an E5.5 H2B-GFP embryo, stained with FM4-64 to visualise membranes. The VE cell highlighted is laser ablated (circled in

the left frame). Following ablation, no changes are observed in the underlying epiblast. **(b)** Example of a fixed H2B-GFP embryo, stained with phalloidin immediately following ablation of the arrowed cell. Inspection of several optical (z) sections shows that the epiblast remains intact after ablation of a VE cell. **(c)** Stills from live-imaging of an E5.5 Cer1-GFP embryo in which the leading AVE cell has been ablated, preventing AVE migration. Red and yellow bars highlight the ExE-Epiblast boundary, with the schematic representing the extent of AVE migration. **(d)** Stills from live-imaging of an E5.5 Cer-GFP embryo where the cell following the leading AVE cell has been ablated. Deletion of this cell prevents migration of AVE but not its expansion. **(e)** Control in which a central cell has been ablated. As a result, expansion and migration of AVE are observed. Scale bars represent 100  $\mu\text{m}$ .



**Supplementary Table S1: *In vitro* egg cylinder formation in optically friendly plastic bottom and glass bottom culture dishes compared to conventional plastic tissue culture dishes.**

| Dish                    | Day 2 (N)<br>(attachment) | Day 2 (%)<br>(attachment) | Day 5 (N)<br>(Egg cylinder) | Day 5 (%)<br>(Egg cylinder) |
|-------------------------|---------------------------|---------------------------|-----------------------------|-----------------------------|
| Nunc tissue culture     | 10                        | 100                       | 4                           | 40                          |
| Mat Tek glass           | 2                         | 20                        | 1                           | 50                          |
| Mat Tek collagen coated | 3                         | 30                        | 1                           | 33                          |
| WPI plastic fluorodish  | 3                         | 30                        | 0                           | 0                           |

For each condition, two culture drops were prepared in each case where 5 E3.5 blastocysts were seeded as described in the Materials and Methods. Embryo development was monitored on a daily basis. From Day 2 onwards the analysis refers to the attached embryos. Formation of egg cylinders only occurred in conventional plastic tissue culture dishes.

**Supplementary Table S2: Embryo development on acrylamide matrices with different coatings.**

| Coating     | N total | Attached (N) | Attachment (%) | Egg cylinder (N) | Egg cylinder (%) |
|-------------|---------|--------------|----------------|------------------|------------------|
| Collagen    | 15      | 13           | 87             | 5                | 38               |
| Laminin     | 15      | 2            | 13             | 0                | 0                |
| Fibronectin | 15      | 2            | 13             | 0                | 0                |
| Combination | 15      | 12           | 80             | 5                | 41               |

*In vitro* development of E3.5 blastocysts into egg cylinders was evaluated on a daily basis. The table summarises observations at Day 2 (attachment period) and Day 5 (end point, egg cylinder formation) of *in vitro* culture. Three different individual gels carrying 5 blastocysts each were prepared for each case. From Day 2 onwards the analysis refers to the attached embryos. Optimal outcome was achieved with collagen coating of the acrylamide support.

**Supplementary Table S3: Embryo development on acrylamide matrices prepared on plates with glass bottom wells.**

| Trial | Seeded | Attachment | EC | %  |
|-------|--------|------------|----|----|
| 1     | 8      | 8          | 2  | 25 |
| 2     | 10     | 10         | 1  | 10 |
| 3     | 5      | 5          | 2  | 40 |
| 4     | 11     | 11         | 2  | 18 |

*In vitro* development of E3.5 blastocyst into egg cylinders was evaluated on a daily basis. The table summarises observations at Day 2 (attachment period) and Day 5 (end point, egg cylinder (EC) formation) of *in vitro* culture. Four independent experiments are evaluated.

**SUPPLEMENTARY REFERENCES**

34. Perea-Gomez, A., *et al.* Regionalization of the mouse visceral endoderm as the blastocyst transforms into the egg cylinder. *BMC Dev Biol* **7**, 96 (2007).
35. Torres-Padilla, M.E., *et al.* The anterior visceral endoderm of the mouse embryo is established from both preimplantation precursor cells and by de novo gene expression after implantation. *Dev Biol* **309**, 97-112 (2007).
